# Supplementary material for: Does Targeted Education of Emergency Physicians Improve Their Comfort Level in Treating Psychiatric Patients?
Source: PubMed Central journal article supplement — West J Emerg Med. 2012 Dec;13(6):453–7. doi: 10.5811/westjem.2012.3.6899 (PMC3555590; doi:10.5811/westjem.2012.3.6899), 2012-12
Supplement: wjem-13-453-s004.pdf [file wjem-13-453-s004.pdf]

## APPENDIX IV

**Table 1.** Comparison of pre-intervention and post-intervention survey scores; all participants.

| Comparison of Pre-test & Post-test scores - ALL PARTICIPANTS |                                               |                                              |                                                                      |           |
|--------------------------------------------------------------|-----------------------------------------------|----------------------------------------------|----------------------------------------------------------------------|-----------|
| Scenario                                                     | NINT Mean VAS Score N=34<br>(95% CI; Std Dev) | INT Mean VAS Score N=23<br>(95% CI; Std Dev) | Difference in mean VAS Scores (absolute value),<br>(95% CI; Std Dev) | p-value   |
| 1 MDD                                                        | 48.71 (37.13 60.28; 33.18)                    | 62 (49.71 74.29; 28.43)                      | 13.3 (-30.26 3.68; 31.37)                                            | 0.12**    |
| 2 MDDpTX*                                                    | 50 (38.25 61.75; 33.67)                       | 60.96 (50.73 71.19; 23.65)                   | 10.96 (-27.22 5.31; 30.06)                                           | 0.18**    |
| 3 SCZ                                                        | 37.12 (26.80 47.43; 29.57)                    | 50.87 ( 37.49 64.25; 30.94)                  | 13.75 (-30.05 2.55; 30.12)                                           | 0.10**    |
| 4 PARANOID                                                   | 56.41 ( 47.25 65.58; 26.26)                   | 61.43 ( 51.23 71.64; 23.60)                  | 5.02 (-18.68 8.63; 25.23)                                            | 0.46      |
| 5 SAFD                                                       | 54.62 (44.50 64.73; 28.98)                    | 56.00 (44.95 67.05; 25.55)                   | 1.38 (-16.34 13.58; 27.66)                                           | 0.85      |
| 6 SAFD Ptx                                                   | 43.62 (32.66 54.58; 31.41)                    | 46.22 (34.51 57.93; 27.07)                   | 2.59 (-18.70 13.50; 29.75)                                           | 0.75      |
| 7 BPAD                                                       | 40.71 (30.94 50.48; 28.00)                    | 52.78 (40.83 64.74; 27.64)                   | 12.08 (-27.15 3.00; 27.86)                                           | 0.11**    |
| 8 CRIMINAL                                                   | 15.62 (7.76 23.47; 22.51)                     | 60.13 ( 48.15 72.11; 27.71)                  | 44.51 (-57.89 -31.14; 24.72)                                         | <0.0001** |
| 9 GAD                                                        | 47.29 (36.00 58.59; 32.37)                    | 57.61 ( 45.90 69.32; 27.07)                  | 10.31 ( -26.74 6.11; 30.36)                                          | 0.21      |
| 10 ISI*                                                      | 70.76 (61.82 79.71; 25.64)                    | 72.65 (62.89 82.41; 22.57)                   | 1.89 (-15.12 11.34; 24.46)                                           | 0.77      |

**Table 2.** Comparison of pre-intervention and post-intervention survey scores; residents only.

| Comparison of Pre-test & Post-test scores - RESIDENTS Only |                                               |                                             |                                                                      |         |
|------------------------------------------------------------|-----------------------------------------------|---------------------------------------------|----------------------------------------------------------------------|---------|
| Scenario                                                   | NINT Mean VAS Score N=12 (95%<br>CI; Std Dev) | INT Mean VAS Score N=7<br>(95% CI; Std Dev) | Difference in mean VAS Scores (absolute value),<br>(95% CI; Std Dev) | p-value |
| 1 MDD                                                      | 41 (23.55 58.45; 27.46)                       | 50.29 (33.49 67.08; 18.16)                  | 9.29 (-33.95 15.38; 24.58)                                           | 0.44    |
| 2 MDDpTX*                                                  | 48.58 (32.64 64.53; 25.09)                    | 56.14 (37.80 74.49; 19.84)                  | 7.56 (-31.01 15.89; 23.37)                                           | 0.51    |
| 3 SCZ                                                      | 32.75 (21.55 43.95; 17.62)                    | 46.29 (29.50 63.08; 18.15)                  | 13.54 (-31.40 4.34; 17.81)                                           | 0.13**  |
| 4 PARANOID                                                 | 42.00 (27.01 56.99; 23.59)                    | 53.29 (35.96 70.61; 18.73)                  | 11.29 (-33.36 10.79; 22.00)                                          | 0.30    |
| 5 SAFD                                                     | 44.25 (27.12 61.38; 26.96)                    | 53.57 (35.77 71.38; 19.25)                  | 9.32 (-33.92 15.28; 24.52)                                           | 0.44    |
| 6 SAFD Ptx                                                 | 33.75 (20.25 47.25; 21.25)                    | 52.00 (32.80 71.20; 20.76)                  | 18.25 (-39.40 2.90; 21.08)                                           | 0.09**  |
| 7 BPAD                                                     | 35.83 (24.92 46.74; 17.17)                    | 51.43 (33.78 69.08; 19.09)                  | 15.60 (-33.53 2.34; 17.87)                                           | 0.08**  |
| 8 CRIMINAL                                                 | 20.17 (7.38 32.98; 20.18)                     | 50.71 (35.99 65.44; 15.92)                  | 30.55 (-49.39 -11.71; 18.78)                                         | 0.003** |
| 9 GAD                                                      | 37.08 (22.17 52.00; 23.47)                    | 41.43 (26.57 56.29; 16.07)                  | 4.35 (-25.57 16.88; 21.16)                                           | 0.67    |
| 10 ISI*                                                    | 64.00 (49.10 78.90; 23.45)                    | 62.14 (42.60 81.69; 21.13)                  | 1.86 (-20.88 24.59; 22.68)                                           | 0.87    |

## APPENDIX IV

**Table 3.** Comparison of pre-intervention and post-intervention survey scores; attendings only.

| Comparison of Pre-test & Post-test scores - ATTENDINGS Only |                                               |                                              |                                                                      |                     |
|-------------------------------------------------------------|-----------------------------------------------|----------------------------------------------|----------------------------------------------------------------------|---------------------|
| Scenario                                                    | NINT Mean VAS Score N=22<br>(95% CI; Std Dev) | INT Mean VAS Score N=16<br>(95% CI; Std Dev) | Difference in mean VAS Scores (absolute value),<br>(95% CI; Std Dev) | p-value             |
| 1 MDD                                                       | 54.76 (38.56 70.97; 35.60)                    | 67.13 (50.60 83.65; 31.01)                   | 12.36 (-35.07 10.35; 33.71)                                          | 0.28                |
| 2 MDDpTX*                                                   | 48.43 (31.43 65.43; 37.35)                    | 63.06 (49.51 76.62; 25.44)                   | 14.63 (-38.72 7.45; 32.78)                                           | <b>0.19**</b>       |
| 3 SCZ                                                       | 41.33 (25.72 58.94; 34.30)                    | 52.88 (33.97 71.78; 35.47)                   | 11.54 (-34.99 11.91; 34.81)                                          | 0.32                |
| 4 PARANOID                                                  | 65.00 (53.60 78.40; 25.04)                    | 65.00 (51.60 78.40; 25.14)                   | 0.00 (-16.90 16.90; 25.09)                                           | 1.00                |
| 5 SAFD                                                      | 60.76 (47.25 74.27; 29.68)                    | 57.06 (41.94 72.18; 28.38)                   | 3.70 (-15.92 23.32; 29.13)                                           | 0.70                |
| 6 SAFD Ptx                                                  | 47.57 (31.53 63.61; 35.24)                    | 43.69 (27.88 59.50; 29.67)                   | 3.88 (-18.33 28.09; 32.97)                                           | 0.72                |
| 7 BPAD                                                      | 43.05 (27.90 58.20; 33.28)                    | 53.38 (36.75 70.00; 31.20)                   | 10.33 (-32.16 11.50; 32.41)                                          | 0.34                |
| 8 CRIMINAL                                                  | 13.71 (2.70 24.73; 24.20)                     | 64.25 (47.70 80.80; 31.06)                   | 50.54 (-68.97 -32.11; 27.35)                                         | <b>&lt;0.0001**</b> |
| 9 GAD                                                       | 50.62 (34.77 66.47; 34.83)                    | 64.69 (49.65 79.72; 28.22)                   | 14.07 (-35.73 7.80; 32.16)                                           | <b>0.20**</b>       |
| 10 ISI*                                                     | 75.62 (63.51 87.73; 26.61)                    | 77.25 (65.40 89.10; 22.23)                   | 1.63 (-18.36 15.10; 24.83)                                           | 0.84                |

**Table 4.** Comparison of pre-intervention and post-intervention summary scores.

| Comparison of Pre-test & Post-test scores - SUMMARY SCORES*** - Mean Values |                                                  |                                                 |                                                                              |                |
|-----------------------------------------------------------------------------|--------------------------------------------------|-------------------------------------------------|------------------------------------------------------------------------------|----------------|
|                                                                             | NINT Mean VAS Summary<br>Score (95% CI; Std Dev) | INT Mean VAS Summary<br>Score (95% CI; Std Dev) | Difference in Mean VAS Summary Scores (absolute<br>value), (95% CI; Std Dev) | P-value        |
| Attendings (Pre-test N=21,<br>Post-test N=16)                               | 500.9 (440.8 560.9; 131.9)                       | 608.4 (515.7 701.1; 173.9)                      | 107.5 (-209.5 -5.6; 151.4)                                                   | <b>0.039**</b> |
| Residents (Pre-test N=12,<br>Post-test N=7)                                 | 399.4 (354.3 444.5; 70.9)                        | 517.3 (414.1 620.5; 111.6)                      | 117.9 (-205.6 -30.1; 87.5)                                                   | <b>0.012**</b> |
| All (Pre-test N=33, Post-test<br>N=23)                                      | 464.9 (422.6 507.1; 121.0)                       | 580.7 (511.1 650.2; 160.8)                      | 115.8 (-190.6 -41.0; 138.3)                                                  | <b>0.003**</b> |

Comfort Levels of EPs treating Psychiatric Boarder Patients rated on VAS; \*\*\*Sum of VAS scores for all scenarios/N

**Table 5.** Comparison of pre-intervention and post-intervention summary scores, sensitivity analysis without criminal behavior scenario.

| Summary Score*** SENSITIVITY ANALYSIS - Without CRIMINAL SCENARIO |                                                  |                                                 |                                                                              |               |
|-------------------------------------------------------------------|--------------------------------------------------|-------------------------------------------------|------------------------------------------------------------------------------|---------------|
|                                                                   | NINT Mean VAS Summary<br>Score (95% CI; Std Dev) | INT Mean VAS Summary Score<br>(95% CI; Std Dev) | Difference in Mean VAS Summary Scores (absolute<br>value), (95% CI; Std Dev) | P-value       |
| Attendings (Pre-test N=21,<br>Post-test N=16)                     | 487.1 (425.1 549.2; 136.3)                       | 544.1 (459.7 628.6; 158.4)                      | 56.98 (-155.5 41.5; 146.2)                                                   | 0.25          |
| Residents (Pre-test N=12,<br>Post-test N=7)                       | 379.3 (338.7 419.8; 63.81)                       | 466.6 (376.6 556.6; 97.31)                      | 87.32 (-164.9 -9.75; 77.31)                                                  | <b>0.03**</b> |
| All (Pre-test N=33, Post-test<br>N=23)                            | 449.2 (406.0 492.5; 124.0)                       | 520.5 (457.8 583.2; 145.0)                      | 71.29 (-143.1 0.56; 132.8)                                                   | 0.05          |

Comfort Levels of EPs treating Psychiatric Boarder Patients rated on VAS; \*\*\*Sum of VAS scores for all scenarios/N
